# Supplementary material for: Genome-driven evolutionary game theory helps understand the rise of metabolic interdependencies in microbial communities
Source: PubMed Central journal article supplement (PMC5691134; doi:10.1038/s41467-017-01407-5), 2017-11-16
Supplement: 41467_2017_1407_MOESM2_ESM.pdf [file 41467_2017_1407_MOESM2_ESM.pdf]

## **Description of Additional Supplementary Files**

File Name: Supplementary Data 1

Description: List of genes removed in the model to create auxotrophy for each amino acid.

File Name: Supplementary Data 2

Description: Original data values used in Figure 3C.

File Name: Supplementary Data 3

Description: List of amino acid pairs for which the region of sustainable leakiness levels (or a subset of this region) does not include a unidirectional dependency.

File Name: Supplementary Software 1

Description: Python script implementing the NashEq Finder algorithm
